# Supplementary material for: RCC1L (WBSCR16) isoforms coordinate mitochondrial ribosome assembly through their interaction with GTPases
Source: PLoS Genet. 2020 Jul 31;16(7):e1008923. doi: 10.1371/journal.pgen.1008923 (PMC7423155; doi:10.1371/journal.pgen.1008923)
Supplement: S1 Table — Sequence of the Stealth dsRNAi used for RCC1L silencing. (XLSX) [file pgen.1008923.s011.xlsx]

## Sheet: Sheet1
Name	Target isoform	Sequence sense	Sequence antisense	Position
RNAi 1	V1	AAAGGCUGCCAUCCAAGCUGAGUUC	GAACUCAGCUUGGAUGGCAGCCUUU	3'UTR
RNAi 2	V1	CCGUCUUAGGAAAGCUUAGCUUGAA	UUCAAGCUAAGCAAACCUAAGACGG	3'UTR
RNAi 3	V1	UAGCGUGACUUGCCUUUCCCUUUAA	UUAAAGGGAAAGGCAAGUCACGCUA	3'UTR
RNAi 4	V3	UAAUAUUCAUCAGUGGUGCCAGAUA	UAUCUGGCACCACUGAUGAAUAUUA	3'UTR
RNAi 5	V3	GAGUGGAGAGCGAACUACUUCAUUC	GAAUGAAGUAGUUCGCUCUCCACUC	3'UTR
RNAi 6	V3	CAUCCUAGAGCAAACCUCUGGAGUG	CACUCCAGAGGUUUGCUCUAGGAUG	3'UTR
RNAi 7	V1+V2	UUCCCAGGCACCCUCGGAUGUUCUU	AAGAACAUCCGAGGGUGCCUGGGAA	Exon 9-10
RNAi 8	V1+V2	GGUGCCUGGGAAUCGGUCGCCUGGA	UCCAGGCGACCGAUUCCCAGGCACC	Exon 9-10
RNAi 9	V1+V2+V3	UCAUCUGCUGCUUGCGGCUAUGGAU	AUCCAUAGCCGCAAGCAGCAGAUGA	Exon 1-2
RNAi 10	V1+V2+V3	AACAUCCGCAGUCUUAGAGGACAGC	GCUGUCCUCUAAGACUGCGGAUGUU	Exon 1-2
